# Supplementary material
Source: PubMed Central journal article supplement (PMC9088071)
Supplement: 12889_2022_13246_MOESM1_ESM.pdf [file 12889_2022_13246_MOESM1_ESM.pdf]

Appendix 1 : Algorithms of definition of covariables in the SNDS

| Variables                                                                                                                                          | Algorithms: ICD-10 codes, Drug reimbursements (coded according to the Anatomical Therapeutic Chemical (ATC))     |                                                                                                                                |
|----------------------------------------------------------------------------------------------------------------------------------------------------|------------------------------------------------------------------------------------------------------------------|--------------------------------------------------------------------------------------------------------------------------------|
| <b>Individual maternal deprivation</b>                                                                                                             |                                                                                                                  |                                                                                                                                |
| Problems related to education and literacy                                                                                                         | Z55.0: Illiteracy and low-level literacy                                                                         |                                                                                                                                |
|                                                                                                                                                    | Z55.1: Schooling unavailable and unattainable                                                                    |                                                                                                                                |
|                                                                                                                                                    | Z55.8: Other problems related to education and literacy, Inadequate teaching                                     |                                                                                                                                |
|                                                                                                                                                    | Z55.9: Problem related to education and literacy, unspecified                                                    |                                                                                                                                |
| Problems related to economic circumstances                                                                                                         | Z59.5: Extreme poverty                                                                                           |                                                                                                                                |
|                                                                                                                                                    | Z59.6: Low income                                                                                                |                                                                                                                                |
| Inadequate housing                                                                                                                                 | Z59.0: Homelessness;                                                                                             |                                                                                                                                |
|                                                                                                                                                    | Z59.1: Inadequate housing                                                                                        |                                                                                                                                |
|                                                                                                                                                    | Z59.8: Other problems related to housing and economic circumstances                                              |                                                                                                                                |
|                                                                                                                                                    | Z59.9: Problem related to housing and economic circumstances, unspecified,                                       |                                                                                                                                |
|                                                                                                                                                    |                                                                                                                  |                                                                                                                                |
| <b>Parity was coded in the delivery hospital stay for women who delivered vaginally (2015)</b>                                                     |                                                                                                                  |                                                                                                                                |
| <b>Parity</b>                                                                                                                                      | JQGD001: Single breech vaginal birth by a woman who has previously given birth                                   |                                                                                                                                |
|                                                                                                                                                    | JQGD002: Multiple vaginal birth by a woman giving birth for the first time                                       |                                                                                                                                |
|                                                                                                                                                    | JQGD003: Single breech vaginal birth with arms extracted before head by a woman giving birth for the first time  |                                                                                                                                |
|                                                                                                                                                    | JQGD004: Single breech vaginal birth by a woman giving birth for the first time                                  |                                                                                                                                |
|                                                                                                                                                    | JQGD005: Single breech vaginal birth with breech extraction by a woman who has previously given birth            |                                                                                                                                |
|                                                                                                                                                    | JQGD007: Multiple vaginal birth by a woman who has previously given birth                                        |                                                                                                                                |
|                                                                                                                                                    | JQGD008: Single breech vaginal birth with arms extracted before head by a woman who has previously given birth   |                                                                                                                                |
|                                                                                                                                                    | JQGD010: Single cephalic vaginal birth by a woman giving birth for the first time                                |                                                                                                                                |
|                                                                                                                                                    | JQGD012: Single cephalic vaginal birth by a woman who has previously given birth                                 |                                                                                                                                |
|                                                                                                                                                    | JQGD013 : Single breech vaginal birth with breech extraction by a woman giving birth for the first time          |                                                                                                                                |
|                                                                                                                                                    | <b>For women who had a cesarean section, their childbirth history since 2006 was searched to identify parity</b> |                                                                                                                                |
|                                                                                                                                                    | <b>Previous PTB</b>                                                                                              | At least one birth occurring prior to a gestational age of 37 completed weeks during previous pregnancy between 2010 and 2014. |
|                                                                                                                                                    | <b>Previous SGA</b>                                                                                              | At least one SGA between 2013 and 2014                                                                                         |
| <b>Smoking was identified by specific coding at hospital or by the reimbursement of nicotine replacement treatments before or during pregnancy</b> |                                                                                                                  |                                                                                                                                |
| <b>Previous tobacco consumption</b>                                                                                                                | F17: Mental and behavioral disorders due to use of tobacco                                                       |                                                                                                                                |
|                                                                                                                                                    | Z716: Tobacco abuse counselling                                                                                  |                                                                                                                                |
|                                                                                                                                                    | Z720: Tobacco use                                                                                                |                                                                                                                                |
|                                                                                                                                                    | I731: Thromboangiitis obliterans (Buerger)                                                                       |                                                                                                                                |
|                                                                                                                                                    | J41: Simple and mucopurulent chronic bronchitis                                                                  |                                                                                                                                |
|                                                                                                                                                    | J42: Unspecified chronic bronchitis                                                                              |                                                                                                                                |
|                                                                                                                                                    | J43: Emphysema                                                                                                   |                                                                                                                                |
| J44: Other chronic obstructive pulmonary disease                                                                                                   |                                                                                                                  |                                                                                                                                |

T652: Toxic effect of tobacco and nicotine

N07BA01: Nicotine replacement therapy

**AND:**

C67: Malignant neoplasm of bladder

C16: Malignant neoplasm of stomach

C64-66,C68: Malignant neoplasms of urinary tract

C22: Malignant neoplasm of liver and intrahepatic bile ducts

C25: Malignant neoplasm of pancreas

**AND:**

N07BA03: nicotine replacement treatments

R03BB04, R03BB06, R03BB07: treatment of Chronic Obstructive Pulmonary Disease

**Obesity**

E66

**Previous  
hypertension**

If women have had at least three dispensations of antihypertensive medication at three different dates in the year preceding the pregnancy (or on two dates, if at least one large package (for 3 months) of antihypertensive drugs was dispensed), or if they were hospitalized with a primary diagnosis mentioning a preexisting hypertension (ICD-10 codes: O10, O11) during pregnancy or postpartum (6 weeks postpartum).

---
