# Supplementary material
Source: PubMed Central journal article supplement (PMC9088071)
Supplement: 12889_2022_13246_MOESM2_ESM.pdf [file 12889_2022_13246_MOESM2_ESM.pdf]

## Appendix 2: Multilevel models

(a) **Description of data** : Presentation of all covariables of the six multilevel models used in the National perinatal surveys statistical analyses.

| Covariables                                  | Preterm birth |    |    |    |    |    | Small for gestational age |    |    |    |    |    |
|----------------------------------------------|---------------|----|----|----|----|----|---------------------------|----|----|----|----|----|
|                                              | M1            | M2 | M3 | M4 | M5 | M6 | M1                        | M2 | M3 | M4 | M5 | M6 |
| FDep-quintile                                | x             | x  | x  |    |    |    | x                         | x  | x  |    |    |    |
| FEDI-quintile                                |               |    |    | x  | x  | x  |                           |    |    | x  | x  | x  |
| Household monthly income                     | x             |    |    | x  |    |    | x                         |    |    | x  |    |    |
| Mother's educational level                   |               | x  |    |    | x  |    |                           | x  |    |    | x  |    |
| Mother's individual social deprivation index |               |    | x  |    |    | x  |                           |    | x  |    |    | x  |
| Maternal age                                 | x             | x  | x  | x  | x  | x  | x                         | x  | x  | x  | x  | x  |
| Parity                                       | x             | x  | x  | x  | x  | x  | x                         | x  | x  | x  | x  | x  |
| Previous PTB                                 | x             | x  | x  | x  | x  | x  |                           |    |    |    |    |    |
| Previous SGA                                 |               |    |    |    |    |    | x                         | x  | x  | x  | x  | x  |
| Other adverse obstetric history              | x             | x  | x  | x  | x  | x  | x                         | x  | x  | x  | x  | x  |
| Mother's birth country                       | x             | x  | x  | x  | x  | x  | x                         | x  | x  | x  | x  | x  |
| Pre-pregnancy body mass index (BMI)          | x             | x  | x  | x  | x  | x  | x                         | x  | x  | x  | x  | x  |
| Cannabis use                                 | x             | x  | x  | x  | x  | x  | x                         | x  | x  | x  | x  | x  |
| Smoking at the third trimester               | x             | x  | x  | x  | x  | x  | x                         | x  | x  | x  | x  | x  |

M1, M2, ...M6 are the six models presented in the statistical analysis section.
