# Supplementary material
Source: PubMed Central journal article supplement (PMC9088071)
Supplement: 12889_2022_13246_MOESM3_ESM.pdf [file 12889_2022_13246_MOESM3_ESM.pdf]

**Appendix 3:** Maps of the quintiles of the municipalities according to FDep and FEDI indices;

Distribution of municipalities' urban-rural status according to the quintiles of FDep and FEDI.

(a) **Description of data :** classification of municipalities in the various quintiles of FDep and FEDI : The FEDI tended to classify urban municipalities in more deprived quintiles, whereas the FDep tended to classify them in less deprived quintiles.

FDep

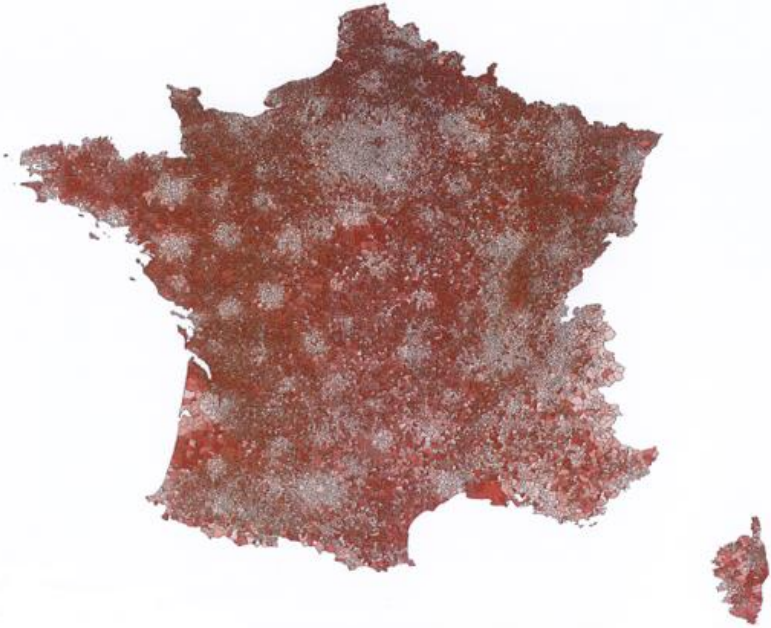

FEDI

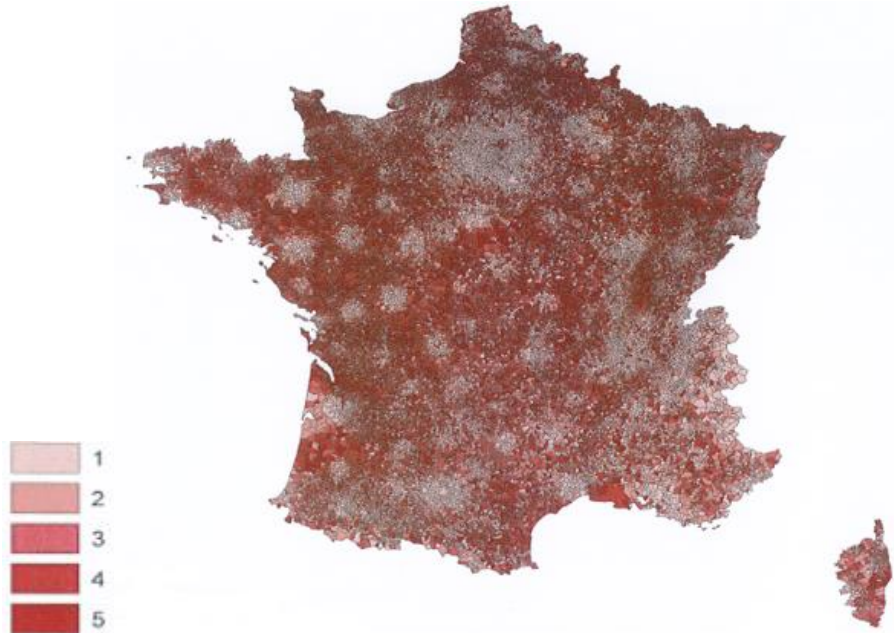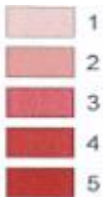

Quintiles of FDep/FEDI

**(b) Description of data :** Distribution of municipalities' urban–rural status according to the quintiles of FDep and FEDI.

| <b>status of municipalities*</b>                      |      | <b>Q1</b> |      | <b>Q2</b> |      | <b>Q3</b> |      | <b>Q4</b> |      | <b>Q5</b> |      |
|-------------------------------------------------------|------|-----------|------|-----------|------|-----------|------|-----------|------|-----------|------|
| Isolated rural with very low density                  | Fdep | 6.5       | 529  | 16.1      | 1307 | 21.3      | 1728 | 28.3      | 2292 | 27.7      | 2243 |
|                                                       | FEDI | 13.5      | 1091 | 18.3      | 1480 | 22.0      | 1782 | 23.9      | 1936 | 22.3      | 1805 |
| Isolated rural with low density                       | Fdep | 2.5       | 202  | 12.3      | 989  | 20.25     | 1634 | 33.0      | 2665 | 32.0      | 2581 |
|                                                       | FEDI | 8.7       | 700  | 16.9      | 1360 | 22.4      | 1810 | 26.7      | 2158 | 25.3      | 2043 |
| Rural with low relationship with an employment hub    | Fdep | 8.1       | 598  | 22.0      | 1626 | 26.0      | 1920 | 27.3      | 2011 | 16.6      | 1226 |
|                                                       | FEDI | 19.9      | 1470 | 23.7      | 1749 | 21.9      | 1615 | 20.1      | 1485 | 14.4      | 1061 |
| Rural with strong relationship with an employment hub | Fdep | 23.0      | 1649 | 33.3      | 2387 | 23.2      | 1658 | 15.3      | 1092 | 5.2       | 374  |
|                                                       | FEDI | 41.2      | 2949 | 24.8      | 1773 | 16.6      | 1187 | 11.1      | 791  | 6.4       | 460  |
| Suburban (intermediate density)                       | Fdep | 27.1      | 907  | 23.4      | 784  | 17.4      | 583  | 16.0      | 537  | 16.2      | 542  |
|                                                       | FEDI | 21.5      | 721  | 16.6      | 557  | 14.6      | 490  | 15.1      | 507  | 32.1      | 1078 |
| Urban centre (highly urban)                           | Fdep | 37.6      | 287  | 21.7      | 166  | 13.4      | 102  | 11.9      | 91   | 15.5      | 118  |
|                                                       | FEDI | 4.6       | 35   | 7.5       | 57   | 12.0      | 92   | 13.6      | 104  | 62.3      | 476  |

\* : Urban–rural status of the municipalities in which mothers live was identified using a new French definition in 6 groups. An urban unit is a municipality or a group of municipalities that includes a built-up area of at least 2000 inhabitants and in which no building is farther than 200 m away from its nearest neighbour. Urban units are further categorised as: Highly urban (more than 50% of the population lives in cluster with 1 500 inhabitants per km<sup>2</sup> or in in cluster with 1 500 inhabitants per km<sup>2</sup>), and Suburban (more than 50% of the population lives in clusters with 300 inhabitants per km<sup>2</sup> or in clusters with 300 inhabitants per km<sup>2</sup>). Rural municipalities are categorised in: i) Rural municipalities with strong relationship with an employment hub (belonging to the catchment area of cities with over 50,000 inhabitants; more than 30% of their employed workers work in this employment hub). ii) Rural with low relationship with an employment hub (belonging to the catchment area of cities with over 50,000 inhabitants; less than 30% of their employed workers work in this employment hub). iii) isolated rural with low density (less than 50% of the population lives in cluster of 300 inhabitants per km<sup>2</sup>); iv) isolated rural with very low density (more than 50% of the population lives in cluster with 300 inhabitants per km<sup>2</sup>).
