# Supplementary material
Source: PubMed Central journal article supplement (PMC9088071)
Supplement: 12889_2022_13246_MOESM4_ESM.pdf [file 12889_2022_13246_MOESM4_ESM.pdf]

Appendix 4: Multivariate multilevel analyses for the FDep components in the SNDS.

(a) Association between FDep components and preterm birth (Appendix 4a)

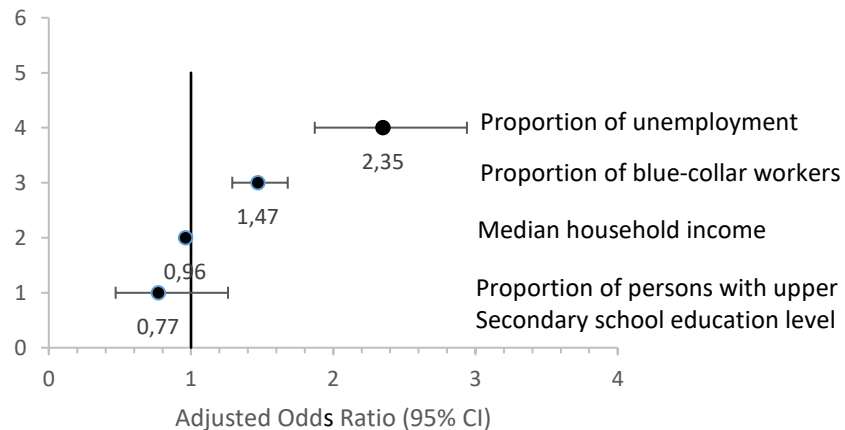

(b) Association between FDep components and Small for gestational age (Appendix 4b)

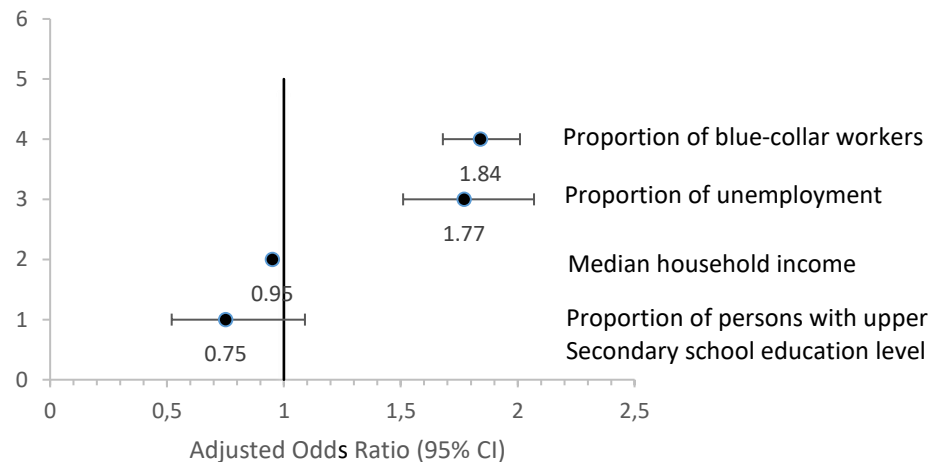

aOR (95% CI) = adjusted odds ratio (95% confidence interval) from multilevel analyses. One component adjusted for individual mother's characteristics per model.
