# Supplementary material
Source: PubMed Central journal article supplement (PMC9088071)
Supplement: 12889_2022_13246_MOESM5_ESM.pdf [file 12889_2022_13246_MOESM5_ESM.pdf]

Appendix 5: Multivariate multilevel analyses for the FEDI components in the SNDS:

(a) Association between FEDI components and preterm birth (Appendix 5a)

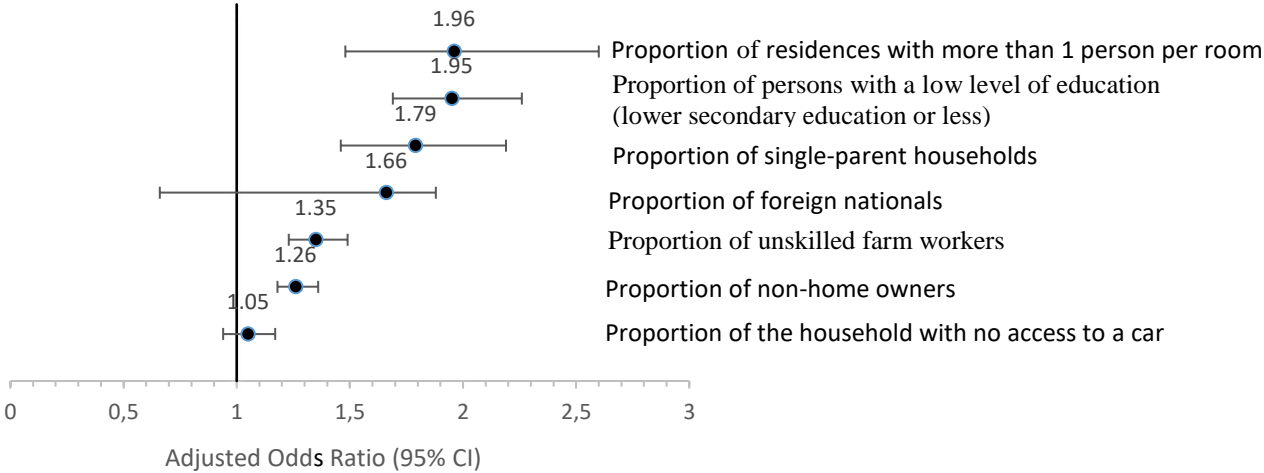

(a) Association between FEDI components and small for gestational age (Appendix 5b)

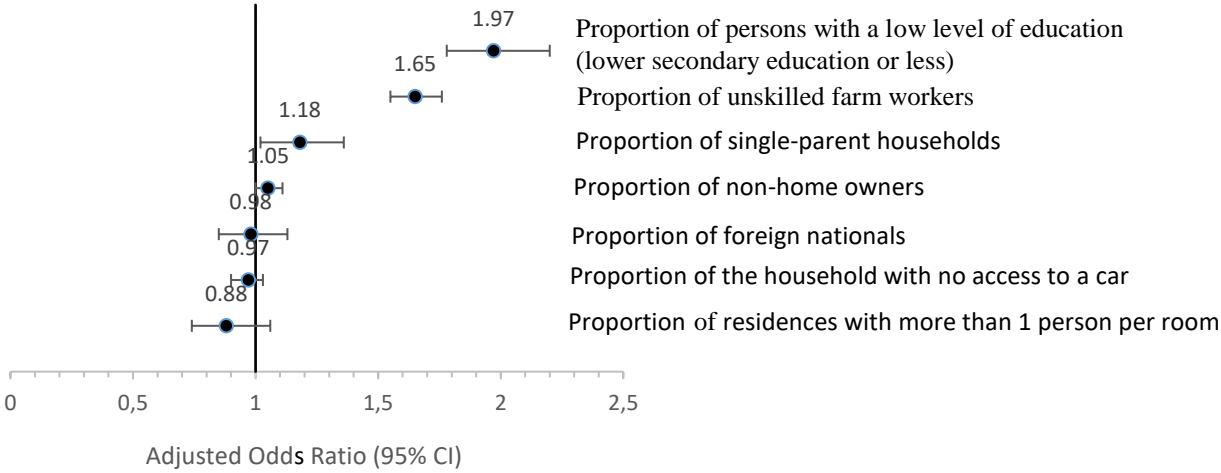

aOR (95% CI) = adjusted odds ratio (95% confidence interval) from multilevel analyses. One component adjusted for individual mother’s characteristic per model.
